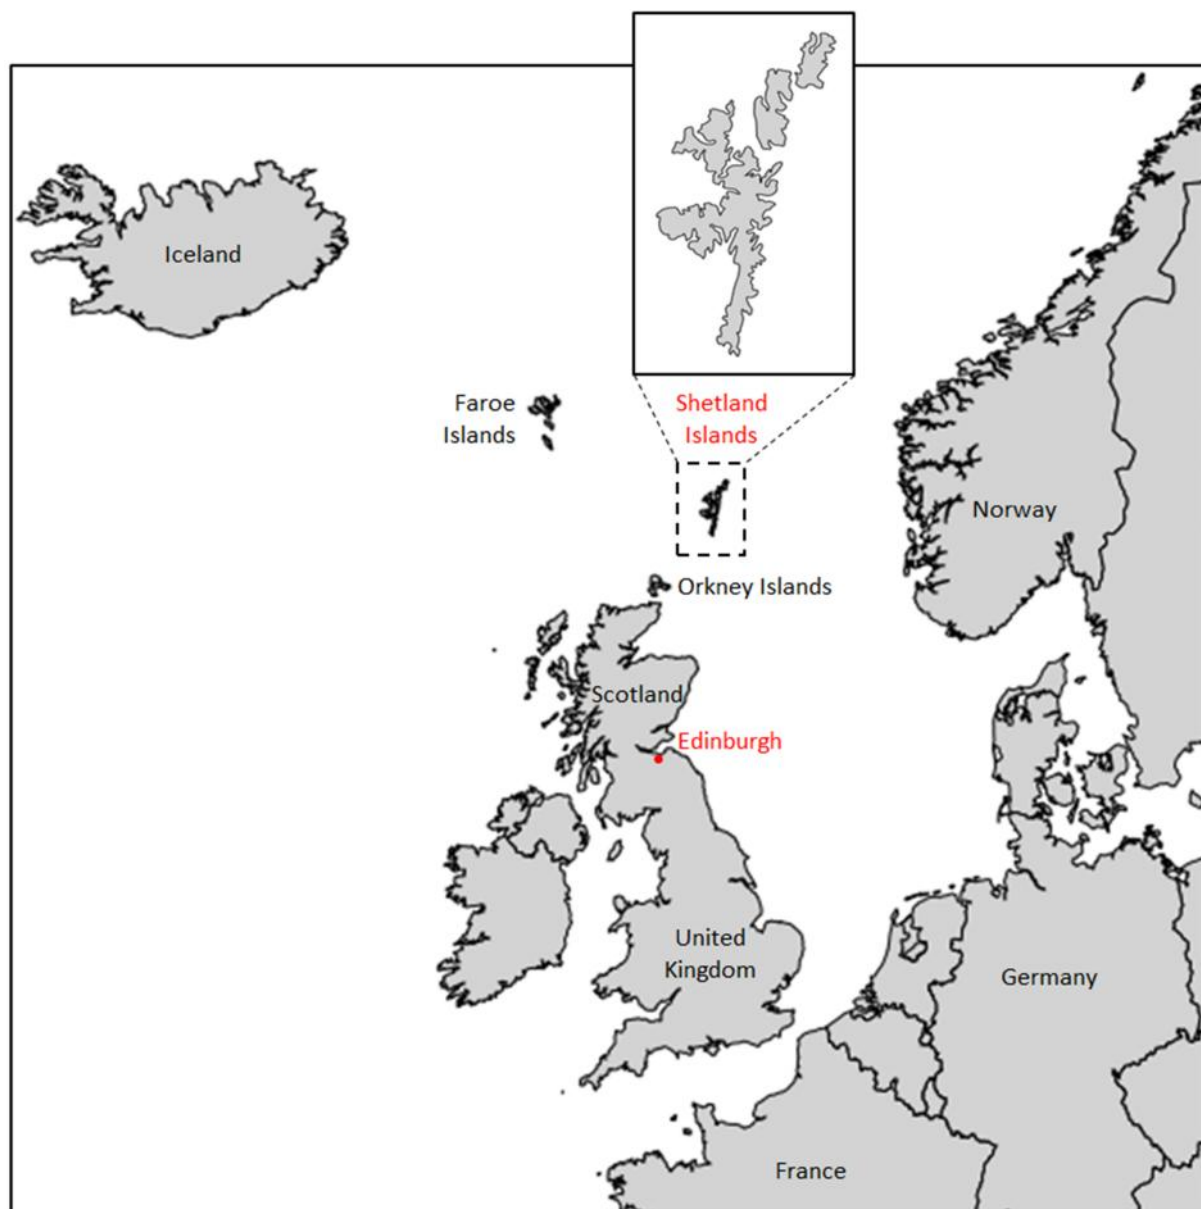

S1 Fig. Geographic localization of the Shetland Islands.
