# Supplementary material for: Increased ultra-rare variant load in an isolated Scottish population impacts exonic and regulatory regions
Source: PLOS journal article supplement (doi:10.1371/journal.pgen.1008480), 2019-11-25
Supplement: S12 (10.1371/journal.pgen.1008480.s012) [file journal.pgen.1008480.s012]

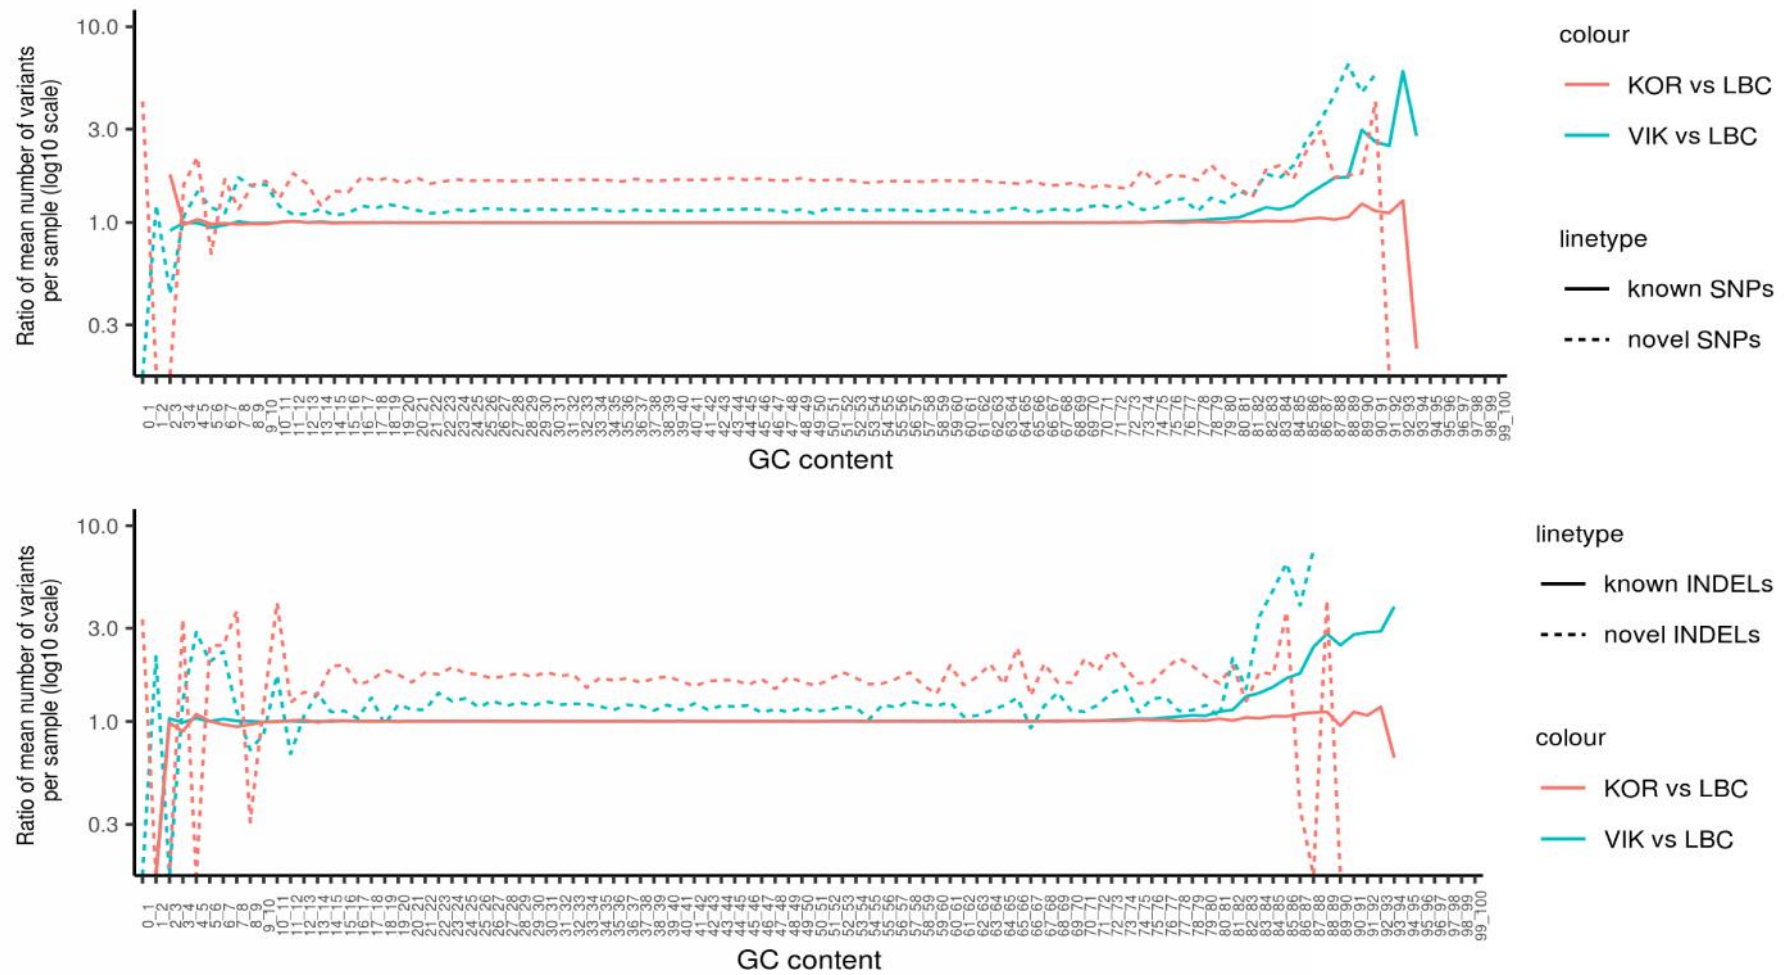

**S12 Fig. Kit effect on the number of discovered variants as a function of the GC content.**
